# Supplementary material for: The effect of listening to music on human transcriptome
Source: PubMed Central journal article supplement (PMC4362302; doi:10.7717/peerj.830), 2015-03-12

**Normal Q-Q Plot**

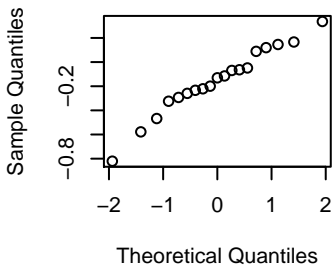

**Normal Q-Q Plot**

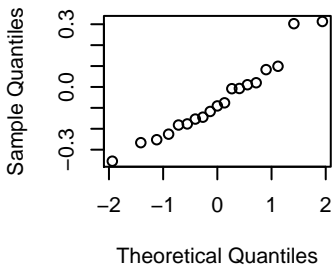

**Normal Q-Q Plot**

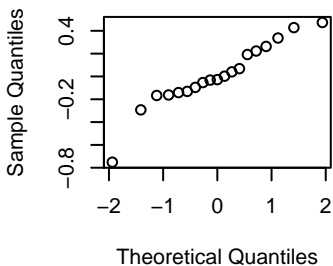

**Normal Q-Q Plot**

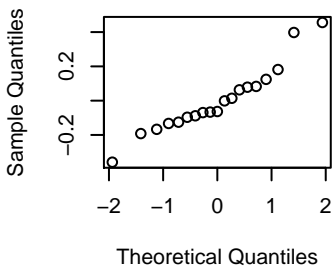

**Normal Q-Q Plot**

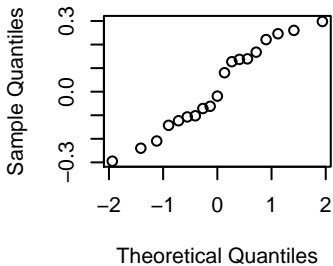

**Normal Q-Q Plot**

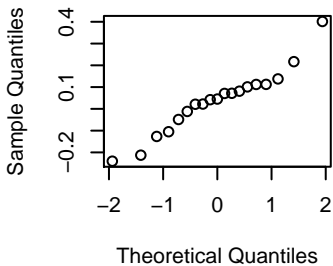

**Normal Q-Q Plot**

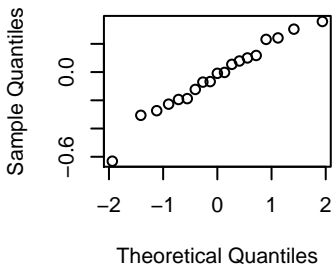

**Normal Q-Q Plot**

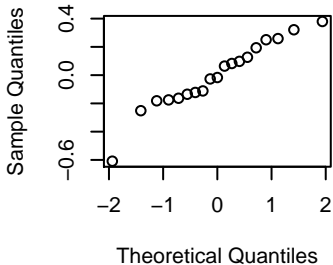

**Normal Q-Q Plot**

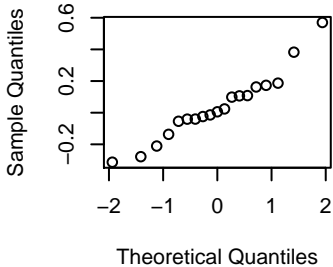

**Normal Q-Q Plot**

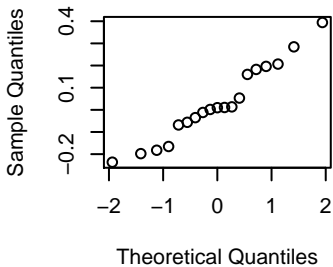

**Normal Q-Q Plot**

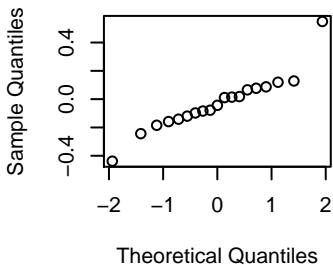

**Normal Q-Q Plot**

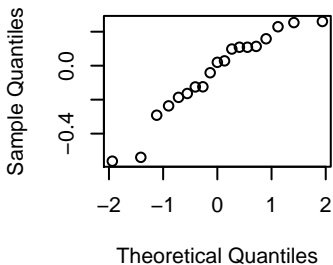

**Normal Q-Q Plot**

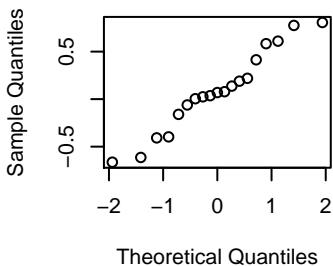

**Normal Q-Q Plot**

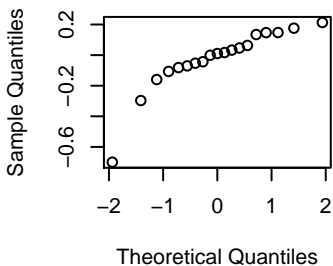

**Normal Q-Q Plot**

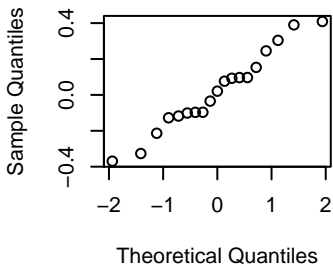

**Normal Q-Q Plot**

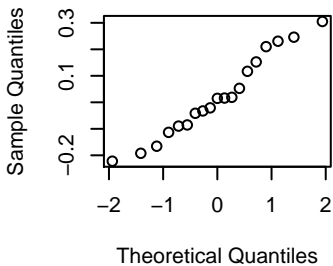

**Normal Q-Q Plot**

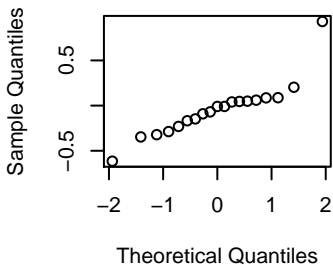

**Normal Q-Q Plot**

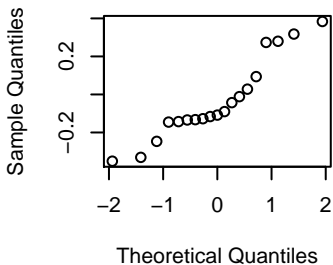

**Normal Q-Q Plot**

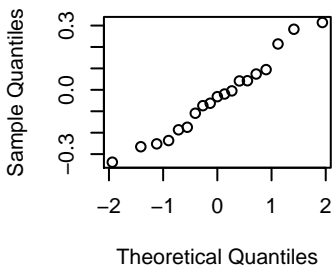

**Normal Q-Q Plot**

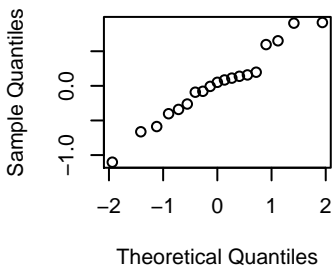

**Normal Q-Q Plot**

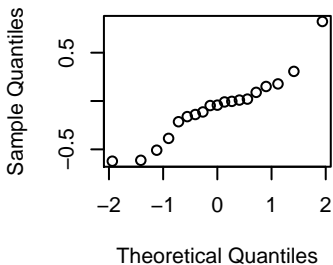

**Normal Q-Q Plot**

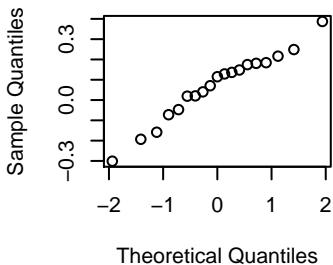

**Normal Q-Q Plot**

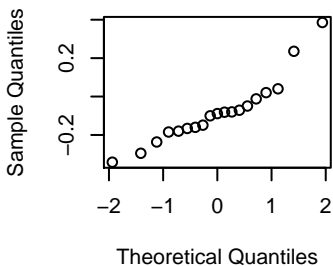

**Normal Q-Q Plot**

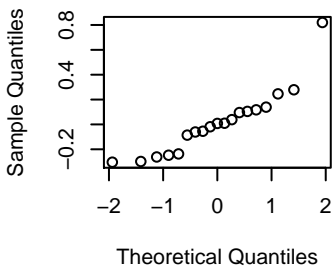

**Normal Q-Q Plot**

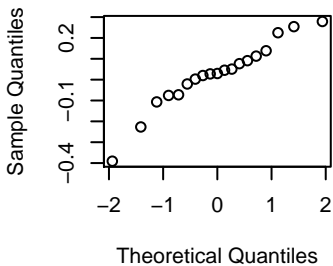

**Normal Q-Q Plot**

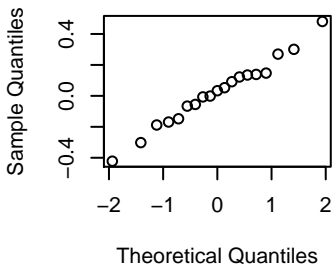

**Normal Q-Q Plot**

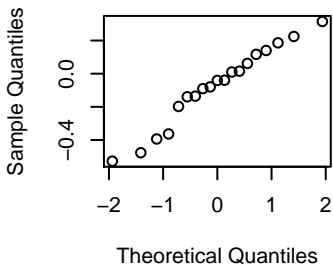

**Normal Q-Q Plot**

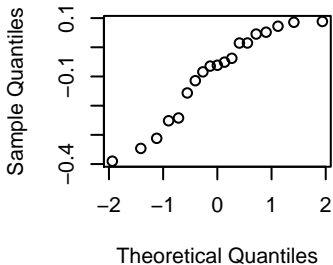

**Normal Q-Q Plot**

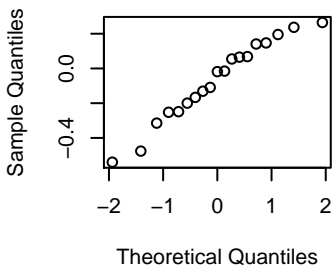

**Normal Q-Q Plot**

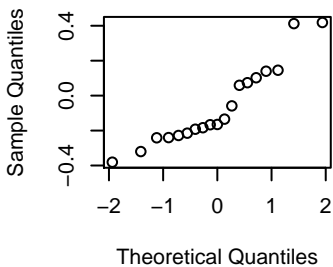

**Normal Q-Q Plot**

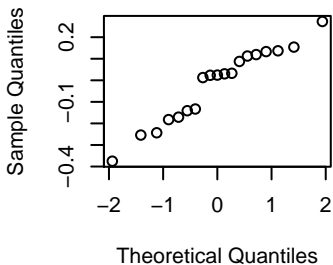

**Normal Q-Q Plot**

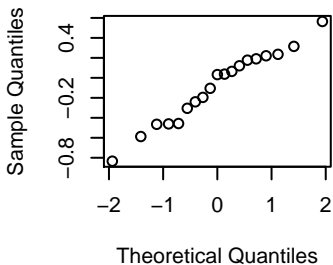

**Normal Q-Q Plot**

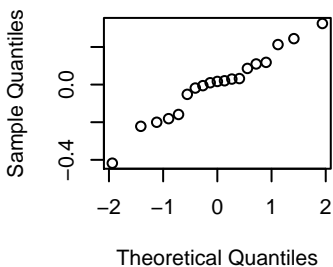

**Normal Q-Q Plot**

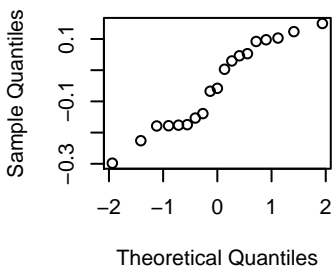

**Normal Q-Q Plot**

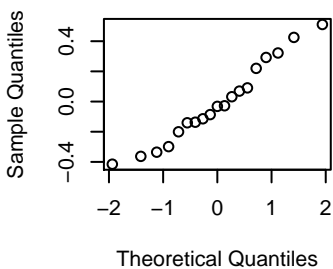

**Normal Q-Q Plot**

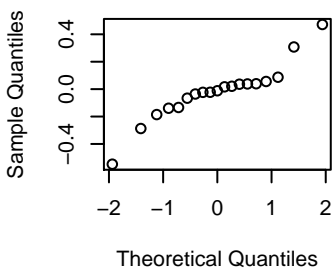

**Normal Q-Q Plot**

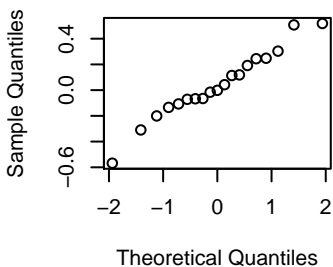

**Normal Q-Q Plot**

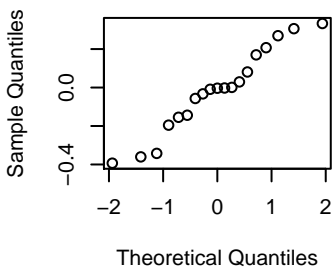

**Normal Q-Q Plot**

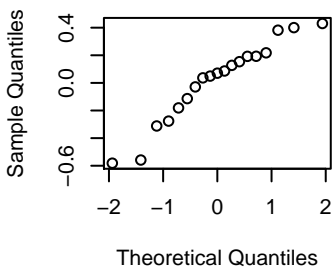

**Normal Q-Q Plot**

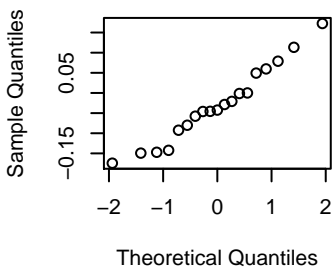

Supplement: peerj-03-830-s001.pdf [file peerj-03-830-s001.pdf]
