# Supplementary material for: The effect of listening to music on human transcriptome
Source: PeerJ. 2015 Mar 12;3:e830. doi: 10.7717/peerj.830 (PMC4362302; doi:10.7717/peerj.830)
Supplement: Table S2 [file peerj-03-830-s003.xls]

## Sheet: Sheet1
listeners (edu classes 3-4) VS controls
Gene	FC..class1.class2.	pfp	P.value
PABPC1	1.7233	0	0
LOC644936	1.4953	0	0
SNCA	1.4244	0	0
DICER1	1.3706	0	0
RTN4	1.3441	0.0022	0
LYST	1.3087	0.0221	2e-04
APOBEC3A	1.3012	0.001	0
ZNF83	1.2995	0.0113	0
FTH1P8	1.2899	0.0251	2e-04
HDAC4	1.2858	0.0225	2e-04
ELOVL5	1.2803	0.0122	1e-04
FKBP8	1.28	0.0181	1e-04
JMJD1C	1.269	0.0232	2e-04
UBALD1	1.2676	0.011	0
SLC6A8	1.2526	0.0477	7e-04
SUMO2	1.2516	0.0218	2e-04
FAM49B	1.2439	0.0325	3e-04
MYC	1.2413	0.0355	4e-04
TBC1D9	1.236	0.0269	3e-04
ABHD5	1.2331	0.0247	2e-04
MYADM	1.23	0.0207	1e-04
KLF4	1.2289	0.0191	1e-04
NRGN	1.2271	0.0395	5e-04
NEDD9	1.2266	0.0394	5e-04
SMNDC1	1.2132	0.0393	5e-04
INTS8	1.2088	0.0263	2e-04
SEP15	1.2068	0.04	5e-04
GNPTG	0.8133	0.0343	5e-04
PCED1B-AS1	0.8117	0.002	0
GOLGA8A	0.803	0.0306	5e-04
LINC00152	0.8008	0.0209	3e-04
AKR1C3	0.7998	0.0146	2e-04
HEATR1	0.7965	0	0
GZMH	0.7898	0.0094	1e-04
C11orf48	0.7849	0.01	1e-04
ATP5L	0.7811	0.0131	1e-04
IFI6	0.7744	0	0
FLJ38717	0.7643	8e-04	0
AKIRIN1	0.7581	8e-04	0
RNA18S5	0.7577	0	0
NBPF10	0.7263	0	0
GZMA	0.7155	0	0
ATP5J	0.7083	0	0
NBPF9	0.6989	0	0
SHFM1	0.6733	0	0

## Sheet: Sheet3
listeners (high COMB scores) VS controls
Gene	FC..class1.class2.	pfp	P.value
PABPC1	2.185	0	0
LOC644936	1.6031	0	0
APOBEC3A	1.5197	0.0025	0
RTN4	1.4738	0.0023	0
FLI1	1.4731	0.0018	0
ANXA2P1	1.4639	0.0025	0
DICER1	1.463	0.0033	0
RAPGEF2	1.4235	0.0055	0
JMJD1C	1.4214	0.0056	0
ADD3	1.4174	0.005	0
UBE2B	1.414	0.0069	0
SACM1L	1.4132	0.0056	0
SEP15	1.4086	0.0047	0
DUSP6	1.395	0.008	0
WRNIP1	1.3907	0.0078	0
ZNF83	1.3827	0.0056	0
FCGR3B	1.3807	0.0022	0
FAM49B	1.378	0.0071	0
PPP2CB	1.3683	0.0102	1e-04
SLC4A7	1.3676	0.0124	1e-04
SNCA	1.3657	0.0044	0
AHSA2	1.363	0.0218	2e-04
MOB1A	1.3617	0.0111	1e-04
LYST	1.3606	0.0102	1e-04
SNX10	1.3584	0.0149	1e-04
S100A12	1.3524	0.0081	0
NPTN	1.3514	0.0319	3e-04
CREBRF	1.3504	0.0156	1e-04
MYL12A	1.3496	0.0057	0
HIGD1A	1.3471	0.0057	0
ELOVL5	1.3471	0.0082	0
SPG11	1.347	0.0208	2e-04
SYNJ1	1.3434	0.0079	0
GABARAPL2	1.3431	0.0085	0
DDX39B	1.3426	0.0159	1e-04
SUMO2	1.34	0.0134	1e-04
MAN2A1	1.3357	0.0336	4e-04
PPDPF	1.3306	0.0154	1e-04
OSBPL8	1.3256	0.0073	0
RNASEH2B	1.325	0.0313	3e-04
LOC100132352	1.3225	0.0489	6e-04
FKBP1A	1.3222	0.0067	0
HNRNPU	1.3208	0.002	0
ZNF483	1.3207	0.0029	0
TFG	1.3205	0.031	3e-04
CD3E	1.3189	0.0206	2e-04
MFF	1.3177	0.0411	5e-04
JKAMP	1.3171	0.0459	6e-04
ATP11C	1.3165	0.0328	3e-04
NFXL1	1.3158	0.0499	7e-04
UBE4A	1.3139	0.0403	5e-04
TLR1	1.3136	0.0451	6e-04
MS4A7	1.3106	0.0502	7e-04
RGS2	1.3073	0.0111	1e-04
PPP1R12A	1.3058	0.0123	1e-04
USP8	1.3056	0.0329	3e-04
RBM47	1.3047	0.0357	4e-04
PTMA	1.3025	0.0054	0
LRRFIP1	1.3023	0.0017	0
SDHD	1.2976	0.0326	3e-04
MTPN	1.2923	0.0336	4e-04
GRIPAP1	1.2848	0.0047	0
KCTD6	1.2802	0.0404	5e-04
RALGAPA1	1.2797	0.034	4e-04
MBNL1	1.2787	0.0311	3e-04
DSTN	1.2785	0.022	2e-04
TBC1D9	1.2783	0.0385	4e-04
ZNF91	1.2756	0.02	2e-04
KLF4	1.2652	0.0264	2e-04
SMARCA5	1.2642	0.0329	3e-04
FKBP14	1.264	0.0125	1e-04
TMED7	1.2502	0.0443	5e-04
ORC3	1.2397	0.0467	6e-04
HYKK	1.227	0.0265	2e-04
FAM63A	1.2231	0.0076	0
TNFRSF10B	0.8242	0.0113	0
PPP2R3A	0.7922	0.0462	2e-04
ZNF223	0.792	0.0314	1e-04
GP9	0.7857	0.0433	2e-04
SPRYD3	0.7718	0.0274	1e-04
HSPE1	0.7566	0	0
PSMD13	0.7473	0.0373	1e-04
PRKDC	0.7427	0.0057	0
TREM1	0.7405	0.0421	2e-04
VAMP8	0.738	0.0435	2e-04
STIP1	0.7292	0.0042	0
PYCARD	0.7228	0.0109	0
IFI6	0.7184	0	0
RPS9	0.7146	7e-04	0
NBPF10	0.7139	0	0
ATP5J	0.7137	0.0045	0
HEATR1	0.7109	0	0
RPL8	0.7088	0	0
APOBR	0.7076	0.0013	0
HLA-A	0.6779	0	0
NBPF9	0.6701	0	0
RNA18S5	0.6148	0	0
