# Supplementary material for: The effect of listening to music on human transcriptome
Source: PeerJ. 2015 Mar 12;3:e830. doi: 10.7717/peerj.830 (PMC4362302; doi:10.7717/peerj.830)
Supplement: Table S5 [file peerj-03-830-s006.xls]

## Sheet: Sheet1
Upstream regulator analysis-Up-regulated genes
listeners (edu classes 3-4) VS controls
Upstream.Regulator	Molecule.Type	p.value.of.overlap	Target.molecules.in.dataset
PGR	ligand-dependent nuclear receptor	0.000878	KLF4,MYC,NEDD9
NR3C1	ligand-dependent nuclear receptor	0.00117	LYST,MYC,RTN4,SNCA,SUMO2
ESR2	ligand-dependent nuclear receptor	0.00193	KLF4,MYC,NEDD9
estrogen receptor	group	0.00301	DICER1,MYC,NEDD9
FOXO1	transcription regulator	0.00562	ELOVL5,KLF4,MYC
ERBB2	kinase	0.00658	ABHD5,KLF4,MYC,NEDD9
PPARA	ligand-dependent nuclear receptor	0.0114	ELOVL5,MYC,RTN4
listeners (high COMB scores) VS controls
Upstream.Regulator	Molecule.Type	p.value.of.overlap	Target.molecules.in.dataset
HOXA9	transcription regulator	4.79e-05	ADD3,HIGD1A,HNRNPU,MAN2A1,MBNL1,OSBPL8
CD24	other	0.000658	ADD3,JMJD1C,MBNL1,SPG11
NR3C2	ligand-dependent nuclear receptor	0.00597	FKBP1A,LYST,RGS2
Cg	complex	0.00747	DUSP6,KLF4,MTPN,RGS2,SMARCA5
MYC	transcription regulator	0.00902	DDX39B,DSTN,DUSP6,HNRNPU,KLF4,MAN2A1,PTMA,SUMO2
NR3C1	ligand-dependent nuclear receptor	0.00942	HNRNPU,LYST,RGS2,RTN4,SNCA,SUMO2,TLR1
Upstream regulator analysis-Down-regulated genes
listeners (edu classes 3-4) VS controls
NULL
listeners (high COMB scores) VS controls
Upstream.Regulator	Molecule.Type	p.value.of.overlap	Target.molecules.in.dataset
APP	other	0.000512	ATP5J,HSPE1,PRKDC,STIP1,TNFRSF10B
TNFSF10	cytokine	6.9e-05	HLA-A,IFI6,TNFRSF10B
MYCN	transcription regulator	9.23e-05	HLA-A,RPL8,RPS9,TNFRSF10B
IFNA2	cytokine	0.00133	HLA-A,IFI6,TNFRSF10B
MAPT	kinase	0.00164	ATP5J,HSPE1,STIP1
ERK1/2	group	0.00186	HLA-A,TNFRSF10B,TREM1
PSEN1	peptidase	0.0049	ATP5J,HSPE1,STIP1
NFKBIA	transcription regulator	0.00767	IFI6,RPL8,TNFRSF10B
MYC	transcription regulator	0.00799	HLA-A,HSPE1,RPS9,TNFRSF10B
FOS	transcription regulator	0.0116	NBPF10 (includes others),RPS9,TREM1
TNF	cytokine	0.0131	ATP5J,IFI6,PYCARD,TNFRSF10B,TREM1
IFNG	cytokine	0.0254	HLA-A,IFI6,TNFRSF10B,TREM1
